# Supplementary material
Source: Springer Nature journal article supplement (https://www.springermedizin.de/resource/supplementary/12967_2012_1092_MOESM1_ESM.pdf/9573246)

A

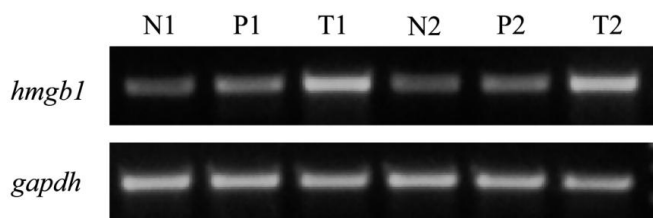

B

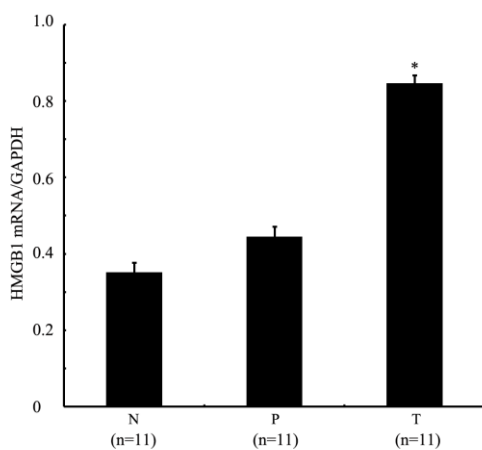

C

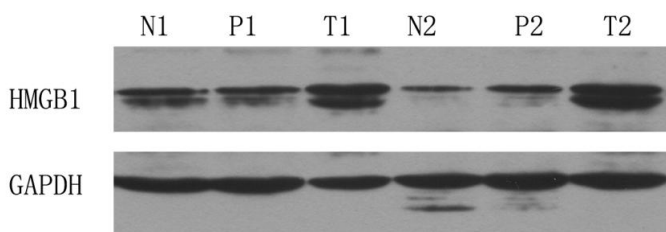

D

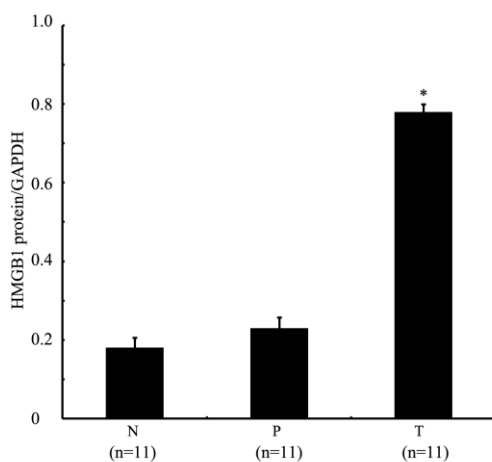

Supplement: MOESM1 [file 9573246]
